# Supplementary material for: The global distribution of Crimean-Congo hemorrhagic fever
Source: PubMed Central journal article supplement (PMC4501401; doi:10.1093/trstmh/trv050), 2015-07-04
Supplement: supp_trv050_trv050supp_fig1.pdf [file supp_trv050_trv050supp_fig1.pdf]

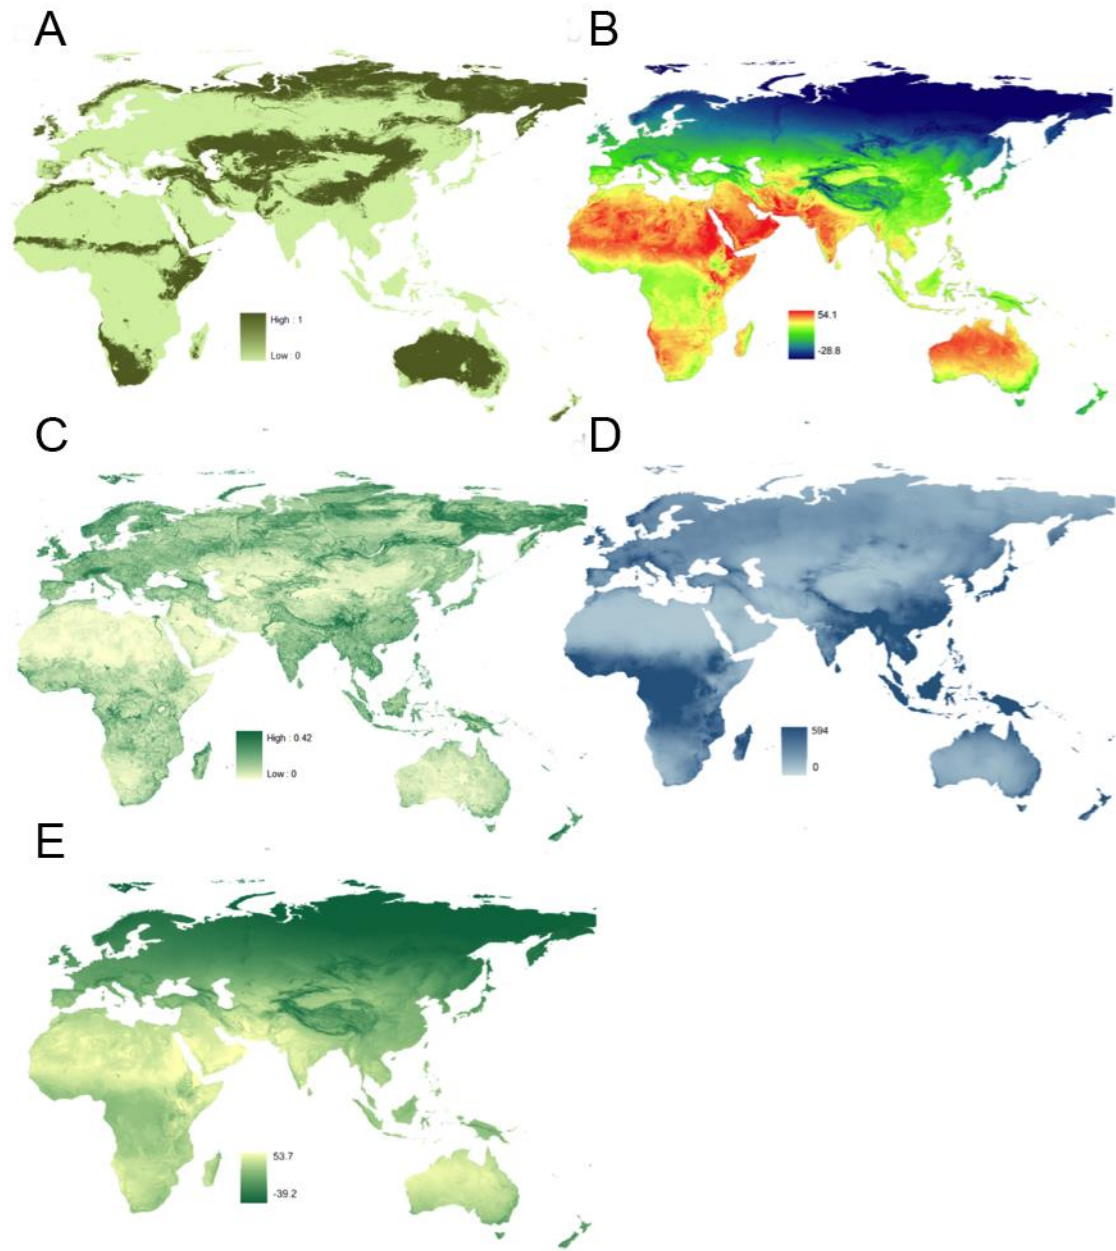

**Supplementary Figure 1.** Plots of all covariates entered into the boosted regression tree (BRT).

A: % grass or shrub land cover; B: mean annual land surface temperature; C: standard deviation of mean annual EVI; D: mean annual precipitation (mm); E: mean annual EVI
